# Supplementary material
Source: PubMed Central journal article supplement (PMC7878280)
Supplement: NIHMS1620184-supplement-1.pdf [file NIHMS1620184-supplement-1.pdf]

Supplementary Information

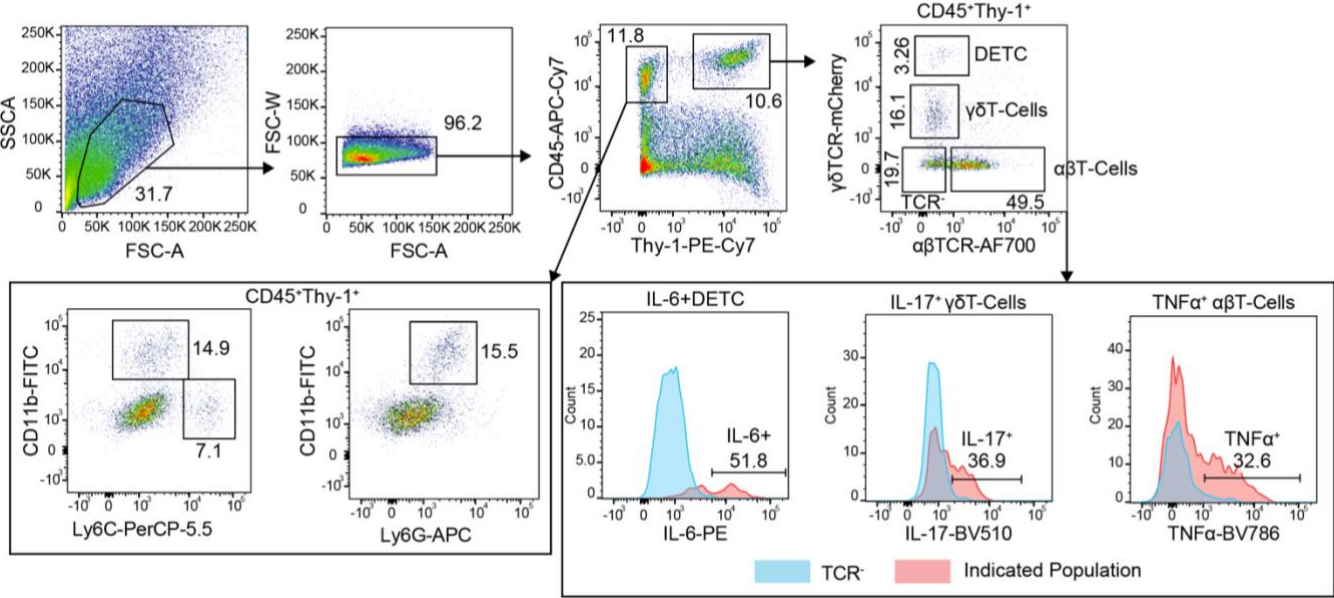

Supplementary Figure 1: Flow cytometry gating method used to identify immune cell populations in murine skin.
